# Supplementary material for: Neobacillus camarae sp. nov. a new bacterium isolated from the breast milk of a senegalese mother breast-feeding a healthy child and genomic description of Neobacillus dielmonensis and Neobacillus drentensis
Source: Research Square preprint supplement (doi:10.21203/rs.3.rs-8725336/v1), 2026-02-10
Supplement: Supplementary file 1 [file 461e8e821efbc28f0ca0ad24.docx]

**Table S4 :** Frequency of detection of the Marseille-QA0830T strain in the human metagenome

| **Metagenome type** | **Total metagenomes** | **Positives metagenomes** | **Prevalence (%)** |
| --- | --- | --- | --- |
| human milk metagenome | 416,515 | 662 | 0.14 % |
| Human gut metagenome | 6,088,359 | 6,991 | 0.11 % |
| human metagenome | 6,012,454 | 3,222 | 0.05 % |
| human skin metagenome | 911,950 | 480 | 0.05 % |
| human oral metagenome | 499,706 | 48 | 0.01 % |
| Human lung metagenome | 181,074 | 83 | 0.04 % |
| Human nasopharyngeal | 3,957,055 | 498 | 0.01 % |
