# Supplementary material for: Neobacillus camarae sp. nov. a new bacterium isolated from the breast milk of a senegalese mother breast-feeding a healthy child and genomic description of Neobacillus dielmonensis and Neobacillus drentensis
Source: Research Square preprint supplement (doi:10.21203/rs.3.rs-8725336/v1), 2026-02-10
Supplement: Supplementary file 2 [file ab85770f1f991f79360c5fc2.docx]

**Table S1.** Summary of 16S rRNA Similarity Results and LPSN Validation

| **Strain** | **16S length (bp)** | **Best BLASTN hit** | **% Identity** | **% Coverage** | **Accession number** | **LPSN Status** |
| --- | --- | --- | --- | --- | --- | --- |
| QA0830T_  *Neobacillus camarae* | 1549 | *Neobacillus niacini* | 98.19 | 100 | [CP183883.1](https://www.ncbi.nlm.nih.gov/nucleotide/CP183883.1?report=genbank&log$=nucltop&blast_rank=5&RID=PNKC4TK6014) | Valid name |
| *Neobacillus dielmonensis* | 1504 | *Neobacillus niacini* | 97.53 | 100 | [CP183883.1](https://www.ncbi.nlm.nih.gov/nucleotide/CP183883.1?report=genbank&log$=nucltop&blast_rank=5&RID=PNKC4TK6014) | Valid name |
| *Neobacillus drentensis* | 1438 | *Neobacillus phoenicis* | 99.35 | 100 | [CP154847.1](https://www.ncbi.nlm.nih.gov/nucleotide/CP154847.1?report=genbank&log$=nucltop&blast_rank=16&RID=PNJY6MTA014) | Valid name |
