# Supplementary material for: Neobacillus camarae sp. nov. a new bacterium isolated from the breast milk of a senegalese mother breast-feeding a healthy child and genomic description of Neobacillus dielmonensis and Neobacillus drentensis
Source: Research Square preprint supplement (doi:10.21203/rs.3.rs-8725336/v1), 2026-02-10
Supplement: Supplementary file 3 [file de7ac45cb90a9cf76aa98bdc.docx]

**Table S3:** Functional distribution of coding sequences (CDSs) among COG categories in the three *Neobacillus* isolates.

| **COG Category** | **Main biological function** | QA0830T _*Neobacillus camarae* **(%)** | | *Neobacillus dielmonensis* ***(%)*** | *Neobacillus drentensis* ***(%)*** |
| --- | --- | --- | --- | --- | --- |
| **E** | Amino acid metabolism and derivatives | | 9.02 | 8.96 | 9.96 |
| **G** | Carbohydrate metabolism | | 8.55 | 8.20 | 6.45 |
| **K** | Transcription and regulation | | 7.95 | 7.51 | 6.51 |
| **T** | Cell signaling, transduction, and regulation | | 4.18 | 4.34 | 4.00 |
| **P** | Membrane transport and stress-related proteins | | 5.52 | 5.06 | 5.44 |
| **M** | Cell wall, membrane, and cellular biogenesis | | 5.18 | 5.41 | 5.20 |
| **C** | Energy production and conversion | | 6.47 | 6.82 | 7.14 |
| **O** | Post-translational modification, protein folding, and chaperones | | 3.58 | 3.55 | 3.65 |
| **F** | DNA replication, recombination, and repair | | 2.27 | 2.41 | 2.66 |
| **L** | Chromosomal replication and modification | | 4.76 | 4.41 | 4.75 |
| **H** | Coenzyme biosynthesis, transport, and metabolism | | 2.96 | 2.96 | 3.47 |
| **Others (D, J, N, Q, S, V)** | Miscellaneous and unassigned functions | | 21.63 | 22.26 | 22.32 |
| **Unclassified / No COG assignment** | Not assigned to any COG category | | 17.93 | 18.11 | 18.45 |
| **Total** |  | | **100.0** | **100.0** | **100.0** |
