# Supplementary material for: Neobacillus camarae sp. nov. a new bacterium isolated from the breast milk of a senegalese mother breast-feeding a healthy child and genomic description of Neobacillus dielmonensis and Neobacillus drentensis
Source: Research Square preprint supplement (doi:10.21203/rs.3.rs-8725336/v1), 2026-02-10
Supplement: Supplementary file 4 [file e3f4124a397c0453f5d337b3.docx]

**Table S2:** Pairwise genomic comparison (ANI and dDDH) among the three isolates and representative *Neobacillus* species

| **Comparison** | **ANI (%)** | **dDDH (%) (GGDC)** | **ΔGC (%)** | **Taxonomic interpretation** |
| --- | --- | --- | --- | --- |
| QA0830_*N. camarae* vs *N. dielmonensis* | 83 | 26.2 | 1.43 | Novel species |
| QA0830_*N. camarae* vs *N.* *drentensis* | 74 | 19.5 | 3.66 | Novel species |
| QA0830_*N. camarae* vs *N. rhizophilus* | 75 | 21.1 | 1.49 | Novel species |
| QA0830_*N. camarae* vs *muris* | 81 | 24.6 | 0.76 | Novel species |
| QA0830_*N. camarae* vs *N. bataviensis* | 75 | 20.1 | 2.75 | Novel species |
| QA0830_*N. camarae* vs *N. endophyticus* | 75 | 22.5 | 3.87 | Novel species |
| QA0830_*N. camarae* vs *N. ginsengisoli* | 74 | 20.2 | 4.25 | Novel species |
| QA0830_*N. camarae* vs *N. jeddahensis* | 74 | 19.6 | 2.93 | Novel species |
| QA0830_*N. camarae* vs *N. mesonae* | 75 | 21.2 | 2.05 | Novel species |
| QA0830_*N. camarae* vs *N. niacini* | 74 | 22.2 | 3.93 | Novel species |
| QA0830_*N. camarae* vs *N. novalis* | 75 | 21.7 | 2.34 | Novel species |
| QA0830_*N. camarae* vs *N. vireti* | 75 | 20.2 | 2.57 | Novel species |
